# Supplementary material for: Novel NPR2 Gene Mutations Affect Chondrocytes Function via ER Stress in Short Stature
Source: MDPI journal article supplement (doi:10.3390/cells11081265), 2022-04-08
Supplement: s1 [file s1]

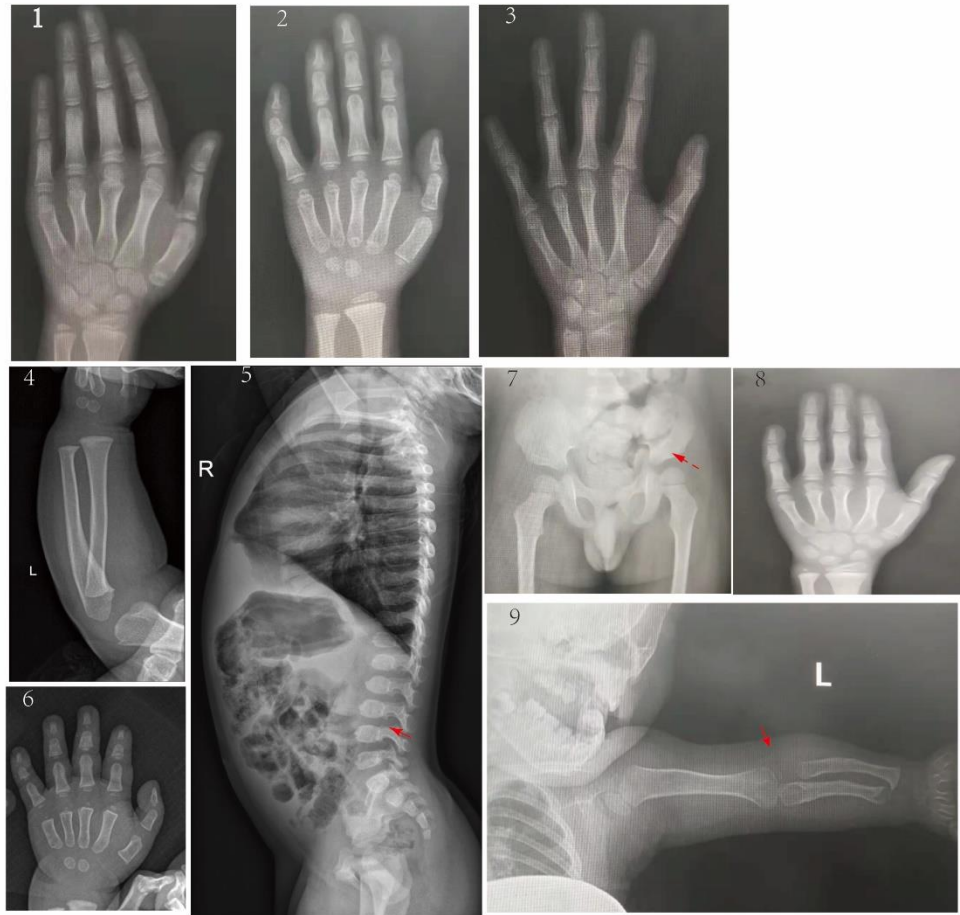

**Figure S1** X-ray imaging performance of five patients, **S1-3** showed patient 1-3 left hand X-ray at 13, 7, 5 years old, respectively. **S4-6** showed X-ray of patient 4 imaged at 1 year old, who harbor the compound heterozygous R363\* & F857S *NPR2* variants, show that vertebrae are severely compressed and deformed. The bone age is 3 years old. **S7-9** showed X-ray of patient 5 imaged at 2 years old, who has Y306S& R557C in *NPR2*, shows bilateral iliac bones are shortened, acetabular rim is unregular (red arrow), as well as the widening of backbone and metaphysis (red arrow). The bone age of patient 5 is 2 years old.
